# Supplementary material for: Detecting disease-associated genes with confounding variable adjustment and the impact on genomic meta-analysis: With application to major depressive disorder
Source: Springer Nature journal article supplement (doi:10.1186/1471-2105-13-52), 2012-03-29

**MD1\_ACC**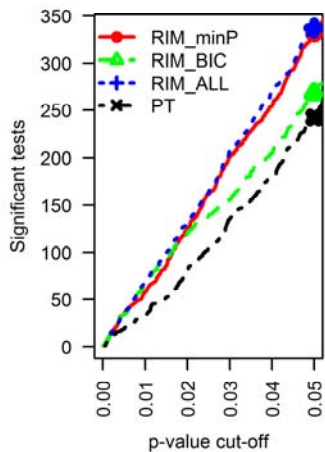**MD2\_ACC**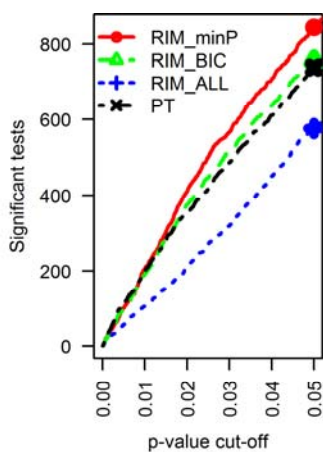**MD3\_ACC**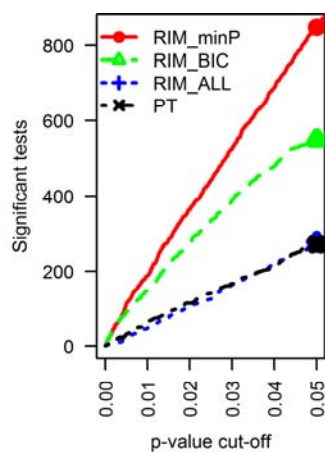**MD1\_AMY**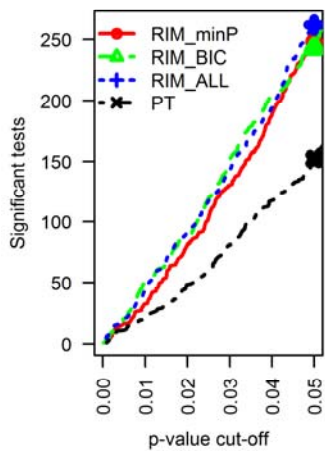**MD3\_AMY**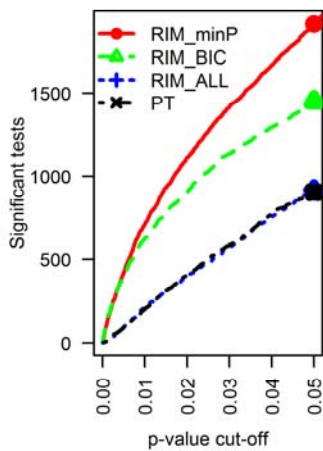

Supplement: 12859_2011_5152_MOESM4_ESM.pdf [file 12859_2011_5152_MOESM4_ESM.pdf]
