# Supplementary material for: Detecting disease-associated genes with confounding variable adjustment and the impact on genomic meta-analysis: With application to major depressive disorder
Source: Springer Nature journal article supplement (doi:10.1186/1471-2105-13-52), 2012-03-29

minP

BIC

PT

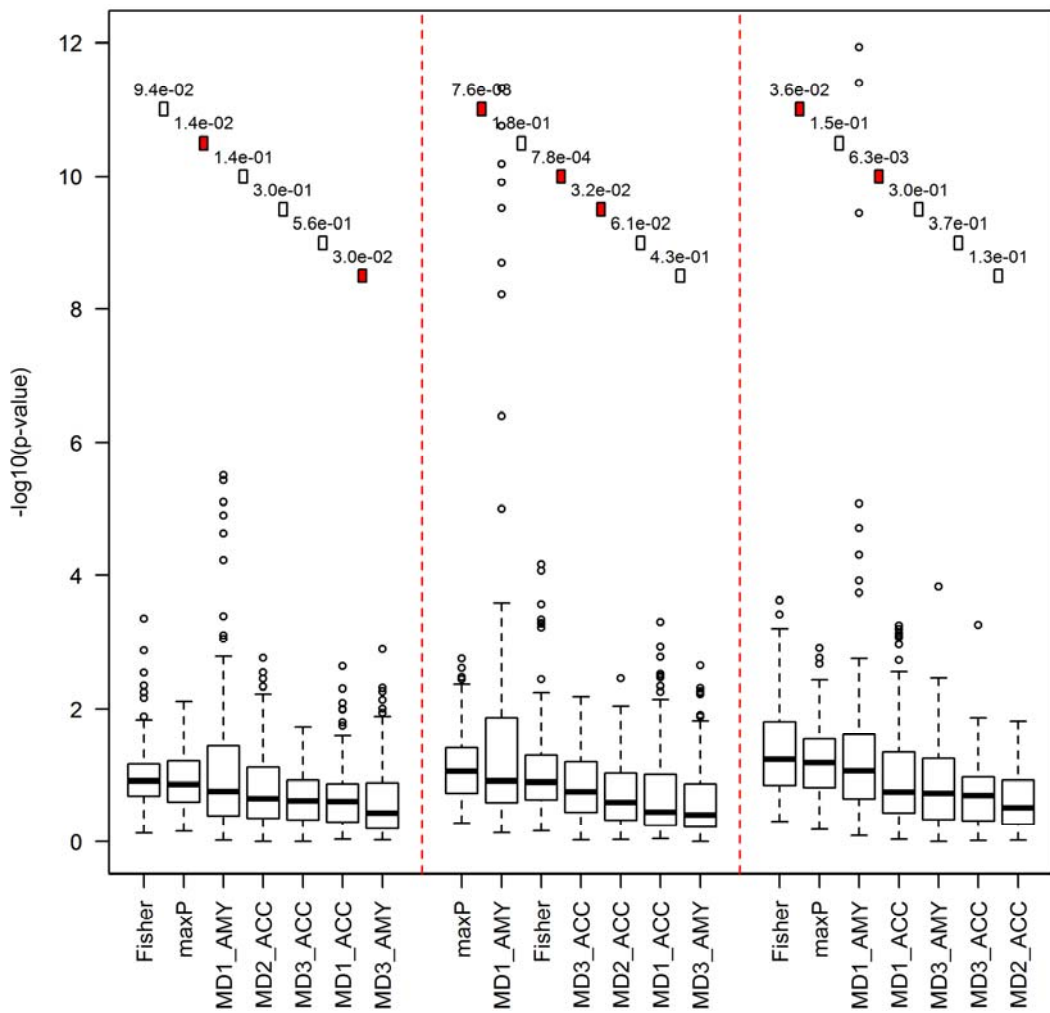

Supplement: 12859_2011_5152_MOESM6_ESM.pdf [file 12859_2011_5152_MOESM6_ESM.pdf]
